# Supplementary material for: Linker histone epitopes are hidden by in situ higher-order chromatin structure
Source: PubMed Central journal article supplement (PMC7276084; doi:10.1186/s13072-020-00345-9), 2020-06-06
Supplement: 13072_2020_345_MOESM2_ESM.pdf [file 13072_2020_345_MOESM2_ESM.pdf]

Table S1. Gene Ontology analysis with DAVID for 100-bp genomic regions where H1.2 xChIP signal dominates over H1.5 xChIP.

| Annotation Cluster 1     |                  | Enrichment Score: 3.59                                   | <b>G</b>  |    | Count | P_Value | Benjamini |
|--------------------------|------------------|----------------------------------------------------------|-----------|---------------------------------------------------------------------------------------|-------|---------|-----------|
| <input type="checkbox"/> | UP_SEQ_FEATURE   | nucleotide phosphate-binding region:ATP                  | <b>RT</b> |    | 60    | 8.5E-7  | 8.6E-4    |
| <input type="checkbox"/> | UP_KEYWORDS      | <a href="#">ATP-binding</a>                              | <b>RT</b> |    | 75    | 1.3E-6  | 1.2E-4    |
| <input type="checkbox"/> | GOTERM_MF_DIRECT | <a href="#">protein serine/threonine kinase activity</a> | <b>RT</b> |    | 30    | 2.6E-5  | 1.8E-2    |
| <input type="checkbox"/> | UP_KEYWORDS      | <a href="#">Serine/threonine-protein kinase</a>          | <b>RT</b> |    | 29    | 2.6E-5  | 1.2E-3    |
| <input type="checkbox"/> | GOTERM_MF_DIRECT | <a href="#">ATP binding</a>                              | <b>RT</b> |    | 79    | 4.6E-5  | 1.5E-2    |
| <input type="checkbox"/> | UP_KEYWORDS      | <a href="#">Nucleotide-binding</a>                       | <b>RT</b> |    | 83    | 8.9E-5  | 3.2E-3    |
| <input type="checkbox"/> | UP_SEQ_FEATURE   | domain:Protein kinase                                    | <b>RT</b> |    | 31    | 1.7E-4  | 8.4E-2    |
| <input type="checkbox"/> | GOTERM_BP_DIRECT | <a href="#">peptidyl-serine phosphorylation</a>          | <b>RT</b> |    | 14    | 2.8E-4  | 5.0E-1    |
| <input type="checkbox"/> | UP_KEYWORDS      | <a href="#">Transferase</a>                              | <b>RT</b> |    | 77    | 3.9E-4  | 1.1E-2    |
| <input type="checkbox"/> | INTERPRO         | <a href="#">Protein kinase-like domain</a>               | <b>RT</b> |  | 33    | 4.6E-4  | 7.0E-2    |
| <input type="checkbox"/> | INTERPRO         | <a href="#">Protein kinase, catalytic domain</a>         | <b>RT</b> |  | 31    | 4.8E-4  | 6.5E-2    |
| <input type="checkbox"/> | GOTERM_BP_DIRECT | <a href="#">protein phosphorylation</a>                  | <b>RT</b> |  | 30    | 7.3E-4  | 5.9E-1    |
| <input type="checkbox"/> | UP_SEQ_FEATURE   | active site:Proton acceptor                              | <b>RT</b> |  | 37    | 8.4E-4  | 1.7E-1    |

| Annotation Cluster 1     |                  | Enrichment Score: 3.59                                       |    |    | Count | P_Value | Benjamini |
|--------------------------|------------------|--------------------------------------------------------------|---------------------------------------------------------------------------------------|---------------------------------------------------------------------------------------|-------|---------|-----------|
| <input type="checkbox"/> | UP_KEYWORDS      | <a href="#">Kinase</a>                                       | <a href="#">RT</a>                                                                    |    | 39    | 9.4E-4  | 2.0E-2    |
| <input type="checkbox"/> | UP_SEQ_FEATURE   | binding site:ATP                                             | <a href="#">RT</a>                                                                    |    | 32    | 1.1E-3  | 1.9E-1    |
| <input type="checkbox"/> | INTERPRO         | <a href="#">Serine/threonine-protein kinase, active site</a> | <a href="#">RT</a>                                                                    |    | 22    | 1.1E-3  | 1.1E-1    |
| <input type="checkbox"/> | INTERPRO         | <a href="#">Protein kinase, ATP binding site</a>             | <a href="#">RT</a>                                                                    |    | 25    | 1.3E-3  | 1.1E-1    |
| <input type="checkbox"/> | GOTERM_BP_DIRECT | <a href="#">intracellular signal transduction</a>            | <a href="#">RT</a>                                                                    |    | 26    | 2.3E-3  | 6.1E-1    |
| <input type="checkbox"/> | SMART            | <a href="#">S_TKc</a>                                        | <a href="#">RT</a>                                                                    |    | 26    | 2.8E-3  | 1.8E-1    |
| <input type="checkbox"/> | GOTERM_MF_DIRECT | <a href="#">protein kinase activity</a>                      | <a href="#">RT</a>                                                                    |    | 21    | 1.8E-2  | 4.6E-1    |
| Annotation Cluster 2     |                  | Enrichment Score: 3.44                                       |    |    | Count | P_Value | Benjamini |
| <input type="checkbox"/> | UP_KEYWORDS      | <a href="#">SH3 domain</a>                                   | <a href="#">RT</a>                                                                    |    | 19    | 9.8E-5  | 3.2E-3    |
| <input type="checkbox"/> | INTERPRO         | <a href="#">Src homology-3 domain</a>                        | <a href="#">RT</a>                                                                    |    | 19    | 2.3E-4  | 8.1E-2    |
| <input type="checkbox"/> | UP_SEQ_FEATURE   | domain:SH3                                                   | <a href="#">RT</a>                                                                    |    | 16    | 3.2E-4  | 1.0E-1    |
| <input type="checkbox"/> | SMART            | <a href="#">SH3</a>                                          | <a href="#">RT</a>                                                                    |  | 18    | 2.4E-3  | 4.9E-1    |
| Annotation Cluster 3     |                  | Enrichment Score: 2.55                                       |  |  | Count | P_Value | Benjamini |
| <input type="checkbox"/> | GOTERM_MF_DIRECT | <a href="#">microtubule motor activity</a>                   | <a href="#">RT</a>                                                                    |  | 12    | 6.7E-5  | 1.5E-2    |
| <input type="checkbox"/> | UP_SEQ_FEATURE   | region of interest:AAA 6                                     | <a href="#">RT</a>                                                                    |  | 5     | 5.0E-4  | 1.3E-1    |
| <input type="checkbox"/> | UP_SEQ_FEATURE   | region of interest:AAA 2                                     | <a href="#">RT</a>                                                                    |  | 5     | 6.8E-4  | 1.6E-1    |

| Annotation Cluster 1     |                  | Enrichment Score: 3.59                                          |  |    | Count | P_Value | Benjamini |
|--------------------------|------------------|-----------------------------------------------------------------|-------------------------------------------------------------------------------------|---------------------------------------------------------------------------------------|-------|---------|-----------|
| <input type="checkbox"/> | UP_SEQ_FEATURE   | region of interest:AAA 3                                        | <a href="#">RT</a>                                                                  |    | 5     | 6.8E-4  | 1.6E-1    |
| <input type="checkbox"/> | UP_SEQ_FEATURE   | region of interest:AAA 1                                        | <a href="#">RT</a>                                                                  |    | 5     | 6.8E-4  | 1.6E-1    |
| <input type="checkbox"/> | UP_SEQ_FEATURE   | region of interest:Stem                                         | <a href="#">RT</a>                                                                  |    | 5     | 6.8E-4  | 1.6E-1    |
| <input type="checkbox"/> | UP_SEQ_FEATURE   | region of interest:Stalk                                        | <a href="#">RT</a>                                                                  |    | 5     | 6.8E-4  | 1.6E-1    |
| <input type="checkbox"/> | UP_SEQ_FEATURE   | region of interest:AAA 5                                        | <a href="#">RT</a>                                                                  |    | 5     | 6.8E-4  | 1.6E-1    |
| <input type="checkbox"/> | UP_SEQ_FEATURE   | region of interest:AAA 4                                        | <a href="#">RT</a>                                                                  |    | 5     | 6.8E-4  | 1.6E-1    |
| <input type="checkbox"/> | UP_KEYWORDS      | <a href="#">Motor protein</a>                                   | <a href="#">RT</a>                                                                  |    | 13    | 8.1E-4  | 1.8E-2    |
| <input type="checkbox"/> | INTERPRO         | <a href="#">Dynein heavy chain, P-loop containing D4 domain</a> | <a href="#">RT</a>                                                                  |    | 5     | 1.1E-3  | 1.1E-1    |
| <input type="checkbox"/> | GOTERM_MF_DIRECT | <a href="#">ATPase activity</a>                                 | <a href="#">RT</a>                                                                  |    | 16    | 1.2E-3  | 1.9E-1    |
| <input type="checkbox"/> | INTERPRO         | <a href="#">Dynein heavy chain domain</a>                       | <a href="#">RT</a>                                                                  |    | 5     | 1.4E-3  | 1.1E-1    |
| <input type="checkbox"/> | INTERPRO         | <a href="#">Dynein heavy chain, coiled coil stalk</a>           | <a href="#">RT</a>                                                                  |    | 5     | 1.4E-3  | 1.1E-1    |
| <input type="checkbox"/> | INTERPRO         | <a href="#">Dynein heavy chain</a>                              | <a href="#">RT</a>                                                                  |  | 5     | 1.4E-3  | 1.1E-1    |
| <input type="checkbox"/> | INTERPRO         | <a href="#">Dynein heavy chain, domain-2</a>                    | <a href="#">RT</a>                                                                  |  | 5     | 1.4E-3  | 1.1E-1    |
| <input type="checkbox"/> | UP_KEYWORDS      | <a href="#">Dynein</a>                                          | <a href="#">RT</a>                                                                  |  | 6     | 2.9E-3  | 4.5E-2    |
| <input type="checkbox"/> | GOTERM_CC_DIRECT | <a href="#">axonemal dynein complex</a>                         | <a href="#">RT</a>                                                                  |  | 4     | 3.3E-3  | 2.7E-1    |
| <input type="checkbox"/> | GOTERM_BP_DIRECT | <a href="#">microtubule-based movement</a>                      | <a href="#">RT</a>                                                                  |  | 9     | 5.6E-3  | 8.6E-1    |

| Annotation Cluster 1     |                  | Enrichment Score: 3.59                             |    |    | Count | P_Value | Benjamini |
|--------------------------|------------------|----------------------------------------------------|---------------------------------------------------------------------------------------|---------------------------------------------------------------------------------------|-------|---------|-----------|
| <input type="checkbox"/> | INTERPRO         | <a href="#">ATPase, dynein-related, AAA domain</a> | <a href="#">RT</a>                                                                    |    | 4     | 9.0E-3  | 3.5E-1    |
| <input type="checkbox"/> | UP_KEYWORDS      | <a href="#">Microtubule</a>                        | <a href="#">RT</a>                                                                    |    | 17    | 1.1E-2  | 1.2E-1    |
| <input type="checkbox"/> | GOTERM_CC_DIRECT | <a href="#">microtubule</a>                        | <a href="#">RT</a>                                                                    |    | 19    | 1.2E-2  | 4.0E-1    |
| <input type="checkbox"/> | INTERPRO         | <a href="#">AAA+ ATPase domain</a>                 | <a href="#">RT</a>                                                                    |    | 11    | 1.2E-2  | 3.9E-1    |
| <input type="checkbox"/> | INTERPRO         | <a href="#">Dynein heavy chain, domain-1</a>       | <a href="#">RT</a>                                                                    |    | 3     | 3.2E-2  | 6.2E-1    |
| <input type="checkbox"/> | GOTERM_CC_DIRECT | <a href="#">dynein complex</a>                     | <a href="#">RT</a>                                                                    |    | 4     | 3.2E-2  | 6.1E-1    |
| <input type="checkbox"/> | SMART            | <a href="#">AAA</a>                                | <a href="#">RT</a>                                                                    |    | 11    | 3.6E-2  | 6.8E-1    |
| <input type="checkbox"/> | COG_ONTOLOGY     | <a href="#">Cytoskeleton</a>                       | <a href="#">RT</a>                                                                    |    | 4     | 1.1E-1  | 7.7E-1    |
| <input type="checkbox"/> | KEGG_PATHWAY     | <a href="#">Huntington's disease</a>               | <a href="#">RT</a>                                                                    |    | 10    | 1.7E-1  | 5.0E-1    |
| Annotation Cluster 4     |                  | Enrichment Score: 2.52                             |    |    | Count | P_Value | Benjamini |
| <input type="checkbox"/> | INTERPRO         | <a href="#">Pleckstrin homology-like domain</a>    | <a href="#">RT</a>                                                                    |    | 30    | 1.2E-4  | 1.2E-1    |
| <input type="checkbox"/> | INTERPRO         | <a href="#">Pleckstrin homology domain</a>         | <a href="#">RT</a>                                                                    |  | 19    | 2.8E-3  | 1.7E-1    |
| <input type="checkbox"/> | SMART            | <a href="#">PH</a>                                 | <a href="#">RT</a>                                                                    |  | 19    | 1.3E-2  | 4.6E-1    |
| <input type="checkbox"/> | UP_SEQ_FEATURE   | domain:PH                                          | <a href="#">RT</a>                                                                    |  | 15    | 1.9E-2  | 7.2E-1    |
| Annotation Cluster 5     |                  | Enrichment Score: 2.37                             |  |  | Count | P_Value | Benjamini |
| <input type="checkbox"/> | GOTERM_MF_DIRECT | <a href="#">zinc ion binding</a>                   | <a href="#">RT</a>                                                                    |  | 59    | 1.5E-3  | 1.6E-1    |

| Annotation Cluster 1     |                  | Enrichment Score: 3.59                                 | G  |    | Count | P_Value | Benjamini |
|--------------------------|------------------|--------------------------------------------------------|----|---------------------------------------------------------------------------------------|-------|---------|-----------|
| <input type="checkbox"/> | UP_KEYWORDS      | <a href="#">Zinc</a>                                   | RT |    | 94    | 3.6E-3  | 5.2E-2    |
| <input type="checkbox"/> | UP_KEYWORDS      | <a href="#">Zinc-finger</a>                            | RT |    | 73    | 6.6E-3  | 7.7E-2    |
| <input type="checkbox"/> | UP_KEYWORDS      | <a href="#">Metal-binding</a>                          | RT |    | 134   | 8.9E-3  | 1.0E-1    |
| Annotation Cluster 6     |                  | Enrichment Score: 2.33                                 | G  |    | Count | P_Value | Benjamini |
| <input type="checkbox"/> | INTERPRO         | <a href="#">WW domain</a>                              | RT |    | 9     | 2.6E-4  | 6.8E-2    |
| <input type="checkbox"/> | SMART            | <a href="#">WW</a>                                     | RT |    | 8     | 2.4E-3  | 2.9E-1    |
| <input type="checkbox"/> | UP_SEQ_FEATURE   | domain:WW 2                                            | RT |    | 5     | 1.1E-2  | 6.6E-1    |
| <input type="checkbox"/> | UP_SEQ_FEATURE   | domain:WW 1                                            | RT |    | 5     | 1.1E-2  | 6.6E-1    |
| <input type="checkbox"/> | UP_SEQ_FEATURE   | domain:WW                                              | RT |    | 4     | 2.8E-2  | 7.9E-1    |
| Annotation Cluster 7     |                  | Enrichment Score: 2.29                                 | G  |    | Count | P_Value | Benjamini |
| <input type="checkbox"/> | KEGG_PATHWAY     | <a href="#">Ubiquitin mediated proteolysis</a>         | RT |    | 13    | 1.6E-3  | 1.1E-1    |
| <input type="checkbox"/> | GOTERM_MF_DIRECT | <a href="#">ubiquitin-protein transferase activity</a> | RT |  | 23    | 1.6E-3  | 1.5E-1    |
| <input type="checkbox"/> | UP_KEYWORDS      | <a href="#">Ubl conjugation pathway</a>                | RT |  | 32    | 1.5E-2  | 1.5E-1    |
| <input type="checkbox"/> | GOTERM_BP_DIRECT | <a href="#">protein ubiquitination</a>                 | RT |  | 21    | 1.8E-2  | 9.5E-1    |
| Annotation Cluster 8     |                  | Enrichment Score: 2.27                                 | G  |  | Count | P_Value | Benjamini |
| <input type="checkbox"/> | UP_KEYWORDS      | <a href="#">Cell junction</a>                          | RT |  | 38    | 3.7E-4  | 1.1E-2    |

| Annotation Cluster 1     |                  | Enrichment Score: 3.59                                                     |  |    | Count | P_Value | Benjamini |
|--------------------------|------------------|----------------------------------------------------------------------------|-------------------------------------------------------------------------------------|---------------------------------------------------------------------------------------|-------|---------|-----------|
| <input type="checkbox"/> | UP_KEYWORDS      | <a href="#">Synapse</a>                                                    | <a href="#">RT</a>                                                                  |    | 23    | 1.3E-3  | 2.5E-2    |
| <input type="checkbox"/> | GOTERM_CC_DIRECT | <a href="#">postsynaptic density</a>                                       | <a href="#">RT</a>                                                                  |    | 15    | 2.5E-3  | 2.5E-1    |
| <input type="checkbox"/> | GOTERM_CC_DIRECT | <a href="#">cell junction</a>                                              | <a href="#">RT</a>                                                                  |    | 25    | 1.3E-2  | 4.1E-1    |
| <input type="checkbox"/> | UP_KEYWORDS      | <a href="#">Postsynaptic cell membrane</a>                                 | <a href="#">RT</a>                                                                  |    | 12    | 2.0E-2  | 1.8E-1    |
| <input type="checkbox"/> | GOTERM_CC_DIRECT | <a href="#">postsynaptic membrane</a>                                      | <a href="#">RT</a>                                                                  |    | 12    | 7.8E-2  | 6.8E-1    |
| Annotation Cluster 9     |                  | Enrichment Score: 2.2                                                      |  |    | Count | P_Value | Benjamini |
| <input type="checkbox"/> | KEGG_PATHWAY     | <a href="#">Morphine addiction</a>                                         | <a href="#">RT</a>                                                                  |    | 12    | 1.6E-4  | 1.8E-2    |
| <input type="checkbox"/> | INTERPRO         | <a href="#">3'5'-cyclic nucleotide phosphodiesterase, conserved site</a>   | <a href="#">RT</a>                                                                  |    | 6     | 4.3E-4  | 7.7E-2    |
| <input type="checkbox"/> | INTERPRO         | <a href="#">3'5'-cyclic nucleotide phosphodiesterase, catalytic domain</a> | <a href="#">RT</a>                                                                  |    | 6     | 5.4E-4  | 6.5E-2    |
| <input type="checkbox"/> | UP_KEYWORDS      | <a href="#">cAMP</a>                                                       | <a href="#">RT</a>                                                                  |    | 7     | 6.6E-4  | 1.7E-2    |
| <input type="checkbox"/> | GOTERM_MF_DIRECT | <a href="#">3',5'-cyclic-AMP phosphodiesterase activity</a>                | <a href="#">RT</a>                                                                  |    | 5     | 1.2E-3  | 1.6E-1    |
| <input type="checkbox"/> | GOTERM_BP_DIRECT | <a href="#">cAMP catabolic process</a>                                     | <a href="#">RT</a>                                                                  |  | 5     | 1.3E-3  | 6.4E-1    |
| <input type="checkbox"/> | UP_SEQ_FEATURE   | metal ion-binding site:Divalent metal cation 2                             | <a href="#">RT</a>                                                                  |  | 6     | 1.4E-3  | 2.3E-1    |
| <input type="checkbox"/> | UP_SEQ_FEATURE   | metal ion-binding site:Divalent metal cation 1                             | <a href="#">RT</a>                                                                  |  | 6     | 1.4E-3  | 2.3E-1    |
| <input type="checkbox"/> | INTERPRO         | <a href="#">3'5'-cyclic nucleotide phosphodiesterase</a>                   | <a href="#">RT</a>                                                                  |  | 5     | 2.7E-3  | 1.7E-1    |

| Annotation Cluster 1     |                  | Enrichment Score: 3.59                                             |  |  | Count | P_Value | Benjamini |
|--------------------------|------------------|--------------------------------------------------------------------|-------------------------------------------------------------------------------------|-------------------------------------------------------------------------------------|-------|---------|-----------|
| <input type="checkbox"/> | INTERPRO         | <a href="#">HD/PDEase domain</a>                                   | <a href="#">RT</a>                                                                  |  | 5     | 5.6E-3  | 2.8E-1    |
| <input type="checkbox"/> | GOTERM_MF_DIRECT | <a href="#">3',5'-cyclic-nucleotide phosphodiesterase activity</a> | <a href="#">RT</a>                                                                  |  | 5     | 6.5E-3  | 3.6E-1    |
| <input type="checkbox"/> | SMART            | <a href="#">HDc</a>                                                | <a href="#">RT</a>                                                                  |  | 5     | 1.1E-2  | 4.5E-1    |
| <input type="checkbox"/> | GOTERM_BP_DIRECT | <a href="#">cAMP-mediated signaling</a>                            | <a href="#">RT</a>                                                                  |  | 5     | 3.7E-2  | 9.8E-1    |
| <input type="checkbox"/> | UP_SEQ_FEATURE   | region of interest:Catalytic                                       | <a href="#">RT</a>                                                                  |  | 5     | 7.4E-2  | 9.2E-1    |
| <input type="checkbox"/> | KEGG_PATHWAY     | <a href="#">Purine metabolism</a>                                  | <a href="#">RT</a>                                                                  |  | 10    | 1.2E-1  | 4.2E-1    |
| <input type="checkbox"/> | UP_KEYWORDS      | <a href="#">cGMP</a>                                               | <a href="#">RT</a>                                                                  |  | 3     | 1.3E-1  | 5.2E-1    |
| <input type="checkbox"/> | GOTERM_MF_DIRECT | <a href="#">cAMP binding</a>                                       | <a href="#">RT</a>                                                                  |  | 3     | 1.9E-1  | 9.4E-1    |
| <input type="checkbox"/> | UP_SEQ_FEATURE   | active site:Proton donor                                           | <a href="#">RT</a>                                                                  |  | 8     | 4.1E-1  | 1.0E0     |
