# Supplementary material for: Linker histone epitopes are hidden by in situ higher-order chromatin structure
Source: PubMed Central journal article supplement (PMC7276084; doi:10.1186/s13072-020-00345-9), 2020-06-06
Supplement: 13072_2020_345_MOESM3_ESM.pdf [file 13072_2020_345_MOESM3_ESM.pdf]

Table S2. Gene Ontology analysis with DAVID for 100-bp genomic regions where H1.5 xChIP signal dominates over H1.2 xChIP.

| Annotation Cluster 1     |                  | Enrichment Score: 7.67                                       |  |    | Count | P_Value | Benjamini |
|--------------------------|------------------|--------------------------------------------------------------|-------------------------------------------------------------------------------------|---------------------------------------------------------------------------------------|-------|---------|-----------|
| <input type="checkbox"/> | UP_KEYWORDS      | <a href="#">ATP-binding</a>                                  | <b>RT</b>                                                                           |    | 201   | 7.7E-14 | 6.4E-12   |
| <input type="checkbox"/> | UP_KEYWORDS      | <a href="#">Nucleotide-binding</a>                           | <b>RT</b>                                                                           |    | 242   | 2.4E-13 | 1.7E-11   |
| <input type="checkbox"/> | GOTERM_MF_DIRECT | <a href="#">ATP binding</a>                                  | <b>RT</b>                                                                           |    | 213   | 1.5E-11 | 1.0E-8    |
| <input type="checkbox"/> | UP_SEQ_FEATURE   | nucleotide phosphate-binding region:ATP                      | <b>RT</b>                                                                           |    | 148   | 3.6E-11 | 7.8E-8    |
| <input type="checkbox"/> | UP_KEYWORDS      | <a href="#">Kinase</a>                                       | <b>RT</b>                                                                           |    | 114   | 6.0E-10 | 3.7E-8    |
| <input type="checkbox"/> | UP_KEYWORDS      | <a href="#">Serine/threonine-protein kinase</a>              | <b>RT</b>                                                                           |    | 69    | 1.7E-8  | 7.8E-7    |
| <input type="checkbox"/> | GOTERM_BP_DIRECT | <a href="#">protein phosphorylation</a>                      | <b>RT</b>                                                                           |    | 80    | 2.0E-8  | 4.2E-5    |
| <input type="checkbox"/> | INTERPRO         | <a href="#">Protein kinase-like domain</a>                   | <b>RT</b>                                                                           |    | 88    | 2.0E-8  | 2.3E-5    |
| <input type="checkbox"/> | GOTERM_MF_DIRECT | <a href="#">protein serine/threonine kinase activity</a>     | <b>RT</b>                                                                           |    | 68    | 6.9E-8  | 3.1E-5    |
| <input type="checkbox"/> | INTERPRO         | <a href="#">Protein kinase, catalytic domain</a>             | <b>RT</b>                                                                           |  | 80    | 1.4E-7  | 7.9E-5    |
| <input type="checkbox"/> | UP_SEQ_FEATURE   | binding site:ATP                                             | <b>RT</b>                                                                           |  | 85    | 3.1E-7  | 3.3E-4    |
| <input type="checkbox"/> | INTERPRO         | <a href="#">Serine/threonine-protein kinase, active site</a> | <b>RT</b>                                                                           |  | 57    | 3.5E-7  | 1.3E-4    |
| <input type="checkbox"/> | UP_SEQ_FEATURE   | domain:Protein kinase                                        | <b>RT</b>                                                                           |  | 73    | 2.1E-6  | 1.3E-3    |
| <input type="checkbox"/> | SMART            | <a href="#">S_TKc</a>                                        | <b>RT</b>                                                                           |  | 62    | 1.2E-5  | 2.8E-3    |

| Annotation Cluster 1     |                  | Enrichment Score: 7.67                           | <b>G</b>  |    | Count | P_Value | Benjamini |
|--------------------------|------------------|--------------------------------------------------|-----------|---------------------------------------------------------------------------------------|-------|---------|-----------|
| <input type="checkbox"/> | GOTERM_MF_DIRECT | <a href="#">protein kinase activity</a>          | <b>RT</b> |    | 59    | 1.2E-5  | 3.4E-3    |
| <input type="checkbox"/> | INTERPRO         | <a href="#">Protein kinase, ATP binding site</a> | <b>RT</b> |    | 60    | 2.2E-5  | 4.5E-3    |
| <input type="checkbox"/> | UP_SEQ_FEATURE   | active site:Proton acceptor                      | <b>RT</b> |    | 87    | 1.3E-4  | 4.2E-2    |
| Annotation Cluster 2     |                  | Enrichment Score: 6.98                           | <b>G</b>  |    | Count | P_Value | Benjamini |
| <input type="checkbox"/> | INTERPRO         | <a href="#">Pleckstrin homology-like domain</a>  | <b>RT</b> |    | 79    | 8.0E-10 | 1.8E-6    |
| <input type="checkbox"/> | INTERPRO         | <a href="#">Pleckstrin homology domain</a>       | <b>RT</b> |    | 53    | 1.0E-7  | 7.9E-5    |
| <input type="checkbox"/> | UP_SEQ_FEATURE   | domain:PH                                        | <b>RT</b> |    | 46    | 9.3E-7  | 6.7E-4    |
| <input type="checkbox"/> | SMART            | <a href="#">PH</a>                               | <b>RT</b> |    | 52    | 1.5E-6  | 7.1E-4    |
| Annotation Cluster 3     |                  | Enrichment Score: 4.94                           | <b>G</b>  |    | Count | P_Value | Benjamini |
| <input type="checkbox"/> | INTERPRO         | <a href="#">AGC-kinase, C-terminal</a>           | <b>RT</b> |    | 18    | 4.6E-6  | 1.5E-3    |
| <input type="checkbox"/> | INTERPRO         | <a href="#">Protein kinase, C-terminal</a>       | <b>RT</b> |    | 13    | 4.7E-6  | 1.3E-3    |
| <input type="checkbox"/> | UP_SEQ_FEATURE   | domain:AGC-kinase C-terminal                     | <b>RT</b> |  | 17    | 1.3E-5  | 7.0E-3    |
| <input type="checkbox"/> | SMART            | <a href="#">S TK X</a>                           | <b>RT</b> |  | 17    | 1.3E-5  | 2.0E-3    |
| <input type="checkbox"/> | GOTERM_BP_DIRECT | <a href="#">peptidyl-serine phosphorylation</a>  | <b>RT</b> |  | 27    | 5.5E-5  | 3.8E-2    |
| Annotation Cluster 4     |                  | Enrichment Score: 3.91                           | <b>G</b>  |  | Count | P_Value | Benjamini |
| <input type="checkbox"/> | UP_KEYWORDS      | <a href="#">Ubl conjugation pathway</a>          | <b>RT</b> |  | 99    | 2.1E-7  | 8.1E-6    |

| Annotation Cluster 1     |                  | Enrichment Score: 7.67                                 | <b>G</b>  |    | Count | P_Value | Benjamini |
|--------------------------|------------------|--------------------------------------------------------|-----------|---------------------------------------------------------------------------------------|-------|---------|-----------|
| <input type="checkbox"/> | GOTERM_MF_DIRECT | <a href="#">ligase activity</a>                        | <b>RT</b> |    | 47    | 2.5E-5  | 4.8E-3    |
| <input type="checkbox"/> | GOTERM_MF_DIRECT | <a href="#">ubiquitin-protein transferase activity</a> | <b>RT</b> |    | 53    | 6.3E-5  | 8.4E-3    |
| <input type="checkbox"/> | GOTERM_MF_DIRECT | <a href="#">ubiquitin protein ligase activity</a>      | <b>RT</b> |    | 31    | 1.6E-3  | 1.2E-1    |
| <input type="checkbox"/> | INTERPRO         | <a href="#">Zinc finger, RING-type</a>                 | <b>RT</b> |    | 36    | 5.2E-2  | 7.9E-1    |
| Annotation Cluster 5     |                  | Enrichment Score: 3.65                                 | <b>G</b>  |    | Count | P_Value | Benjamini |
| <input type="checkbox"/> | INTERPRO         | <a href="#">WW domain</a>                              | <b>RT</b> |    | 16    | 4.2E-5  | 7.3E-3    |
| <input type="checkbox"/> | SMART            | <a href="#">WW</a>                                     | <b>RT</b> |    | 16    | 4.3E-5  | 4.0E-3    |
| <input type="checkbox"/> | UP_SEQ_FEATURE   | domain:WW 2                                            | <b>RT</b> |    | 11    | 9.5E-5  | 3.4E-2    |
| <input type="checkbox"/> | UP_SEQ_FEATURE   | domain:WW 1                                            | <b>RT</b> |    | 11    | 9.5E-5  | 3.4E-2    |
| <input type="checkbox"/> | UP_SEQ_FEATURE   | domain:WW                                              | <b>RT</b> |    | 6     | 3.6E-2  | 8.6E-1    |
| Annotation Cluster 6     |                  | Enrichment Score: 3.31                                 | <b>G</b>  |    | Count | P_Value | Benjamini |
| <input type="checkbox"/> | UP_KEYWORDS      | <a href="#">SH3 domain</a>                             | <b>RT</b> |  | 37    | 7.7E-5  | 1.8E-3    |
| <input type="checkbox"/> | UP_SEQ_FEATURE   | domain:SH3                                             | <b>RT</b> |  | 30    | 4.7E-4  | 8.2E-2    |
| <input type="checkbox"/> | INTERPRO         | <a href="#">Src homology-3 domain</a>                  | <b>RT</b> |  | 36    | 4.9E-4  | 4.9E-2    |
| <input type="checkbox"/> | SMART            | <a href="#">SH3</a>                                    | <b>RT</b> |  | 34    | 3.2E-3  | 1.0E-1    |
| Annotation Cluster 7     |                  | Enrichment Score: 3.27                                 | <b>G</b>  |  | Count | P_Value | Benjamini |

| Annotation Cluster 1     |                  | Enrichment Score: 7.67                                                      | <b>G</b>  |    | Count | P_Value | Benjamini |
|--------------------------|------------------|-----------------------------------------------------------------------------|-----------|---------------------------------------------------------------------------------------|-------|---------|-----------|
| <input type="checkbox"/> | INTERPRO         | <a href="#">Zinc finger, A20-type</a>                                       | <b>RT</b> |    | 6     | 2.5E-4  | 3.1E-2    |
| <input type="checkbox"/> | SMART            | <a href="#">ZnF_A20</a>                                                     | <b>RT</b> |    | 6     | 3.9E-4  | 2.2E-2    |
| <input type="checkbox"/> | UP_SEQ_FEATURE   | zinc finger region:A20-type                                                 | <b>RT</b> |    | 5     | 1.6E-3  | 1.8E-1    |
| Annotation Cluster 8     |                  | Enrichment Score: 3.15                                                      | <b>G</b>  |    | Count | P_Value | Benjamini |
| <input type="checkbox"/> | INTERPRO         | <a href="#">Protein kinase C-like, phorbol ester/diacylglycerol binding</a> | <b>RT</b> |    | 19    | 1.3E-5  | 3.3E-3    |
| <input type="checkbox"/> | SMART            | <a href="#">C1</a>                                                          | <b>RT</b> |    | 19    | 3.5E-5  | 4.0E-3    |
| <input type="checkbox"/> | INTERPRO         | <a href="#">Diacylglycerol/phorbol-ester binding</a>                        | <b>RT</b> |    | 10    | 2.0E-4  | 2.6E-2    |
| <input type="checkbox"/> | UP_SEQ_FEATURE   | zinc finger region:Phorbol-ester/DAG-type 1                                 | <b>RT</b> |    | 9     | 3.2E-4  | 6.4E-2    |
| <input type="checkbox"/> | UP_SEQ_FEATURE   | zinc finger region:Phorbol-ester/DAG-type 2                                 | <b>RT</b> |    | 9     | 3.2E-4  | 6.4E-2    |
| <input type="checkbox"/> | GOTERM_MF_DIRECT | <a href="#">protein kinase C activity</a>                                   | <b>RT</b> |    | 6     | 8.7E-3  | 3.5E-1    |
| <input type="checkbox"/> | UP_SEQ_FEATURE   | zinc finger region:Phorbol-ester/DAG-type                                   | <b>RT</b> |   | 10    | 1.3E-2  | 6.0E-1    |
| <input type="checkbox"/> | GOTERM_BP_DIRECT | <a href="#">platelet activation</a>                                         | <b>RT</b> |  | 17    | 6.0E-2  | 9.8E-1    |
| Annotation Cluster 9     |                  | Enrichment Score: 2.93                                                      | <b>G</b>  |  | Count | P_Value | Benjamini |
| <input type="checkbox"/> | UP_KEYWORDS      | <a href="#">Guanine-nucleotide releasing factor</a>                         | <b>RT</b> |  | 31    | 8.3E-6  | 2.6E-4    |
| <input type="checkbox"/> | UP_SEQ_FEATURE   | domain:Ras-GEF                                                              | <b>RT</b> |  | 11    | 9.5E-5  | 3.4E-2    |
| <input type="checkbox"/> | INTERPRO         | <a href="#">Ras guanine nucleotide exchange factor, domain</a>              | <b>RT</b> |  | 11    | 1.8E-4  | 2.5E-2    |

| Annotation Cluster 1     |                  | Enrichment Score: 7.67                                                  |  |    | Count | P_Value | Benjamini |
|--------------------------|------------------|-------------------------------------------------------------------------|-------------------------------------------------------------------------------------|---------------------------------------------------------------------------------------|-------|---------|-----------|
| <input type="checkbox"/> | INTERPRO         | <a href="#">Guanine-nucleotide dissociation stimulator CDC25</a>        | RT                                                                                  |    | 11    | 1.8E-4  | 2.5E-2    |
| <input type="checkbox"/> | SMART            | <a href="#">RasGEF</a>                                                  | RT                                                                                  |    | 11    | 3.8E-4  | 2.9E-2    |
| <input type="checkbox"/> | UP_SEQ_FEATURE   | domain:N-terminal Ras-GEF                                               | RT                                                                                  |    | 8     | 1.9E-3  | 2.0E-1    |
| <input type="checkbox"/> | SMART            | <a href="#">RasGEFN</a>                                                 | RT                                                                                  |    | 8     | 2.1E-3  | 7.8E-2    |
| <input type="checkbox"/> | GOTERM_MF_DIRECT | <a href="#">guanyl-nucleotide exchange factor activity</a>              | RT                                                                                  |    | 22    | 2.2E-3  | 1.5E-1    |
| <input type="checkbox"/> | INTERPRO         | <a href="#">Ras-like guanine nucleotide exchange factor, N-terminal</a> | RT                                                                                  |    | 8     | 2.3E-3  | 1.4E-1    |
| <input type="checkbox"/> | INTERPRO         | <a href="#">Ras guanine-nucleotide exchange factor, conserved site</a>  | RT                                                                                  |    | 6     | 5.7E-3  | 2.7E-1    |
| <input type="checkbox"/> | GOTERM_MF_DIRECT | <a href="#">Rap guanyl-nucleotide exchange factor activity</a>          | RT                                                                                  |    | 3     | 6.9E-2  | 7.7E-1    |
| <input type="checkbox"/> | GOTERM_BP_DIRECT | <a href="#">small GTPase mediated signal transduction</a>               | RT                                                                                  |    | 30    | 9.5E-2  | 9.9E-1    |
| Annotation Cluster 10    |                  | Enrichment Score: 2.88                                                  |  |    | Count | P_Value | Benjamini |
| <input type="checkbox"/> | GOTERM_MF_DIRECT | <a href="#">GTPase activator activity</a>                               | RT                                                                                  |  | 47    | 5.7E-5  | 9.6E-3    |
| <input type="checkbox"/> | GOTERM_BP_DIRECT | <a href="#">regulation of small GTPase mediated signal transduction</a> | RT                                                                                  |  | 26    | 4.5E-4  | 1.6E-1    |
| <input type="checkbox"/> | INTERPRO         | <a href="#">Rho GTPase-activating protein domain</a>                    | RT                                                                                  |  | 15    | 2.1E-3  | 1.3E-1    |
| <input type="checkbox"/> | INTERPRO         | <a href="#">Rho GTPase activation protein</a>                           | RT                                                                                  |  | 18    | 2.7E-3  | 1.6E-1    |
| <input type="checkbox"/> | UP_KEYWORDS      | <a href="#">GTPase activation</a>                                       | RT                                                                                  |  | 30    | 2.9E-3  | 3.4E-2    |

| Annotation Cluster 1     |                  | Enrichment Score: 7.67                                                     | G  |    | Count | P_Value | Benjamini |
|--------------------------|------------------|----------------------------------------------------------------------------|----|---------------------------------------------------------------------------------------|-------|---------|-----------|
| <input type="checkbox"/> | SMART            | <a href="#">RhoGAP</a>                                                     | RT |    | 15    | 3.6E-3  | 1.0E-1    |
| <input type="checkbox"/> | UP_SEQ_FEATURE   | domain:Rho-GAP                                                             | RT |    | 14    | 4.9E-3  | 3.7E-1    |
| Annotation Cluster 11    |                  | Enrichment Score: 2.8                                                      | G  |    | Count | P_Value | Benjamini |
| <input type="checkbox"/> | UP_KEYWORDS      | <a href="#">Metal-binding</a>                                              | RT |    | 380   | 1.1E-5  | 3.2E-4    |
| <input type="checkbox"/> | UP_KEYWORDS      | <a href="#">Zinc-finger</a>                                                | RT |    | 187   | 2.3E-3  | 3.0E-2    |
| <input type="checkbox"/> | GOTERM_MF_DIRECT | <a href="#">zinc ion binding</a>                                           | RT |    | 130   | 1.2E-2  | 3.8E-1    |
| <input type="checkbox"/> | UP_KEYWORDS      | <a href="#">Zinc</a>                                                       | RT |    | 229   | 2.2E-2  | 1.5E-1    |
| Annotation Cluster 12    |                  | Enrichment Score: 2.66                                                     | G  |    | Count | P_Value | Benjamini |
| <input type="checkbox"/> | GOTERM_MF_DIRECT | <a href="#">3',5'-cyclic-AMP phosphodiesterase activity</a>                | RT |    | 9     | 1.7E-5  | 3.8E-3    |
| <input type="checkbox"/> | GOTERM_BP_DIRECT | <a href="#">cAMP catabolic process</a>                                     | RT |    | 9     | 1.7E-5  | 1.8E-2    |
| <input type="checkbox"/> | INTERPRO         | <a href="#">3'5'-cyclic nucleotide phosphodiesterase, conserved site</a>   | RT |    | 10    | 3.9E-5  | 7.3E-3    |
| <input type="checkbox"/> | INTERPRO         | <a href="#">3'5'-cyclic nucleotide phosphodiesterase, catalytic domain</a> | RT |  | 10    | 6.1E-5  | 9.8E-3    |
| <input type="checkbox"/> | INTERPRO         | <a href="#">3'5'-cyclic nucleotide phosphodiesterase</a>                   | RT |  | 9     | 1.2E-4  | 1.8E-2    |
| <input type="checkbox"/> | UP_SEQ_FEATURE   | metal ion-binding site:Divalent metal cation 1                             | RT |  | 10    | 3.9E-4  | 7.4E-2    |
| <input type="checkbox"/> | UP_SEQ_FEATURE   | metal ion-binding site:Divalent metal cation 2                             | RT |  | 10    | 3.9E-4  | 7.4E-2    |
| <input type="checkbox"/> | KEGG_PATHWAY     | <a href="#">Morphine addiction</a>                                         | RT |  | 20    | 4.7E-4  | 1.2E-2    |

| Annotation Cluster 1     |                  | Enrichment Score: 7.67                                             |                    |    |    | Count | P_Value | Benjamini |
|--------------------------|------------------|--------------------------------------------------------------------|--------------------|---------------------------------------------------------------------------------------|---------------------------------------------------------------------------------------|-------|---------|-----------|
| <input type="checkbox"/> | INTERPRO         | <a href="#">HD/PDEase domain</a>                                   | <a href="#">RT</a> |    |                                                                                       | 9     | 5.8E-4  | 5.3E-2    |
| <input type="checkbox"/> | UP_KEYWORDS      | <a href="#">cAMP</a>                                               | <a href="#">RT</a> |    |                                                                                       | 11    | 6.7E-4  | 1.1E-2    |
| <input type="checkbox"/> | SMART            | <a href="#">HDc</a>                                                | <a href="#">RT</a> |    |                                                                                       | 9     | 1.1E-3  | 4.8E-2    |
| <input type="checkbox"/> | UP_SEQ_FEATURE   | region of interest:Catalytic                                       | <a href="#">RT</a> |    |                                                                                       | 13    | 1.3E-3  | 1.6E-1    |
| <input type="checkbox"/> | GOTERM_MF_DIRECT | <a href="#">3',5'-cyclic-nucleotide phosphodiesterase activity</a> | <a href="#">RT</a> |    |                                                                                       | 8     | 3.4E-3  | 2.2E-1    |
| <input type="checkbox"/> | GOTERM_MF_DIRECT | <a href="#">cAMP binding</a>                                       | <a href="#">RT</a> |    |                                                                                       | 7     | 1.8E-2  | 4.5E-1    |
| <input type="checkbox"/> | UP_SEQ_FEATURE   | active site:Proton donor                                           | <a href="#">RT</a> |    |                                                                                       | 27    | 2.3E-2  | 7.4E-1    |
| <input type="checkbox"/> | UP_KEYWORDS      | <a href="#">cGMP</a>                                               | <a href="#">RT</a> |    |                                                                                       | 6     | 2.9E-2  | 1.8E-1    |
| <input type="checkbox"/> | GOTERM_MF_DIRECT | <a href="#">3',5'-cyclic-GMP phosphodiesterase activity</a>        | <a href="#">RT</a> |    |                                                                                       | 5     | 3.3E-2  | 5.7E-1    |
| <input type="checkbox"/> | UP_SEQ_FEATURE   | site:Binds AMP, but not cAMP                                       | <a href="#">RT</a> |    |                                                                                       | 3     | 4.0E-2  | 8.7E-1    |
| <input type="checkbox"/> | KEGG_PATHWAY     | <a href="#">Purine metabolism</a>                                  | <a href="#">RT</a> |   |                                                                                       | 24    | 5.0E-2  | 2.0E-1    |
| <input type="checkbox"/> | UP_SEQ_FEATURE   | binding site:cAMP                                                  | <a href="#">RT</a> |  |                                                                                       | 3     | 8.8E-2  | 9.7E-1    |
| <input type="checkbox"/> | GOTERM_BP_DIRECT | <a href="#">cGMP catabolic process</a>                             | <a href="#">RT</a> |  |                                                                                       | 3     | 1.3E-1  | 9.9E-1    |
| <input type="checkbox"/> | UP_SEQ_FEATURE   | nucleotide phosphate-binding region:cAMP                           | <a href="#">RT</a> |  |                                                                                       | 3     | 2.4E-1  | 1.0E0     |
| Annotation Cluster 13    |                  | Enrichment Score: 2.63                                             |                    |  |  | Count | P_Value | Benjamini |
| <input type="checkbox"/> | GOTERM_MF_DIRECT | <a href="#">microtubule binding</a>                                | <a href="#">RT</a> |  |                                                                                       | 36    | 2.8E-4  | 3.1E-2    |

| Annotation Cluster 1     |                  | Enrichment Score: 7.67      | <b>G</b>  |    | Count | P_Value | Benjamini |
|--------------------------|------------------|-----------------------------|-----------|---------------------------------------------------------------------------------------|-------|---------|-----------|
| <input type="checkbox"/> | GOTERM_CC_DIRECT | <a href="#">microtubule</a> | <b>RT</b> |    | 43    | 4.8E-3  | 2.0E-1    |
| <input type="checkbox"/> | UP_KEYWORDS      | <a href="#">Microtubule</a> | <b>RT</b> |    | 37    | 9.4E-3  | 7.9E-2    |
| Annotation Cluster 14    |                  | Enrichment Score: 2.49      | <b>G</b>  |    | Count | P_Value | Benjamini |
| <input type="checkbox"/> | UP_SEQ_FEATURE   | repeat:ANK 10               | <b>RT</b> |    | 10    | 5.2E-4  | 8.7E-2    |
| <input type="checkbox"/> | UP_SEQ_FEATURE   | repeat:ANK 23               | <b>RT</b> |    | 6     | 8.2E-4  | 1.2E-1    |
| <input type="checkbox"/> | UP_SEQ_FEATURE   | repeat:ANK 22               | <b>RT</b> |    | 6     | 8.2E-4  | 1.2E-1    |
| <input type="checkbox"/> | UP_SEQ_FEATURE   | repeat:ANK 11               | <b>RT</b> |    | 9     | 8.5E-4  | 1.2E-1    |
| <input type="checkbox"/> | UP_SEQ_FEATURE   | repeat:ANK 13               | <b>RT</b> |    | 7     | 1.0E-3  | 1.3E-1    |
| <input type="checkbox"/> | UP_SEQ_FEATURE   | repeat:ANK 14               | <b>RT</b> |    | 7     | 1.0E-3  | 1.3E-1    |
| <input type="checkbox"/> | UP_SEQ_FEATURE   | repeat:ANK 15               | <b>RT</b> |    | 7     | 1.0E-3  | 1.3E-1    |
| <input type="checkbox"/> | UP_SEQ_FEATURE   | repeat:ANK 20               | <b>RT</b> |   | 6     | 1.4E-3  | 1.7E-1    |
| <input type="checkbox"/> | UP_SEQ_FEATURE   | repeat:ANK 21               | <b>RT</b> |  | 6     | 1.4E-3  | 1.7E-1    |
| <input type="checkbox"/> | UP_SEQ_FEATURE   | repeat:ANK 8                | <b>RT</b> |  | 12    | 1.5E-3  | 1.7E-1    |
| <input type="checkbox"/> | UP_SEQ_FEATURE   | repeat:ANK 17               | <b>RT</b> |  | 6     | 2.2E-3  | 2.3E-1    |
| <input type="checkbox"/> | UP_SEQ_FEATURE   | repeat:ANK 18               | <b>RT</b> |  | 6     | 2.2E-3  | 2.3E-1    |
| <input type="checkbox"/> | UP_SEQ_FEATURE   | repeat:ANK 19               | <b>RT</b> |  | 6     | 2.2E-3  | 2.3E-1    |



| Annotation Cluster 1     |                | Enrichment Score: 7.67                           |  |    | Count | P_Value | Benjamini |
|--------------------------|----------------|--------------------------------------------------|-------------------------------------------------------------------------------------|---------------------------------------------------------------------------------------|-------|---------|-----------|
| <input type="checkbox"/> | UP_SEQ_FEATURE | repeat:ANK 7                                     | <a href="#">RT</a>                                                                  |    | 14    | 2.4E-3  | 2.4E-1    |
| <input type="checkbox"/> | UP_SEQ_FEATURE | repeat:ANK 24                                    | <a href="#">RT</a>                                                                  |    | 5     | 2.9E-3  | 2.7E-1    |
| <input type="checkbox"/> | UP_SEQ_FEATURE | repeat:ANK 12                                    | <a href="#">RT</a>                                                                  |    | 7     | 3.0E-3  | 2.8E-1    |
| <input type="checkbox"/> | UP_SEQ_FEATURE | repeat:ANK 16                                    | <a href="#">RT</a>                                                                  |    | 6     | 3.4E-3  | 2.9E-1    |
| <input type="checkbox"/> | UP_KEYWORDS    | <a href="#">ANK repeat</a>                       | <a href="#">RT</a>                                                                  |    | 37    | 3.7E-3  | 4.2E-2    |
| <input type="checkbox"/> | UP_SEQ_FEATURE | repeat:ANK 4                                     | <a href="#">RT</a>                                                                  |    | 26    | 5.8E-3  | 4.0E-1    |
| <input type="checkbox"/> | UP_SEQ_FEATURE | repeat:ANK 9                                     | <a href="#">RT</a>                                                                  |    | 10    | 7.1E-3  | 4.5E-1    |
| <input type="checkbox"/> | INTERPRO       | <a href="#">Ankyrin repeat</a>                   | <a href="#">RT</a>                                                                  |    | 36    | 7.2E-3  | 3.0E-1    |
| <input type="checkbox"/> | INTERPRO       | <a href="#">Ankyrin repeat-containing domain</a> | <a href="#">RT</a>                                                                  |    | 37    | 7.7E-3  | 3.1E-1    |
| <input type="checkbox"/> | UP_SEQ_FEATURE | repeat:ANK 5                                     | <a href="#">RT</a>                                                                  |    | 22    | 1.0E-2  | 5.4E-1    |
| <input type="checkbox"/> | UP_SEQ_FEATURE | repeat:ANK 6                                     | <a href="#">RT</a>                                                                  |    | 17    | 1.0E-2  | 5.4E-1    |
| <input type="checkbox"/> | UP_SEQ_FEATURE | repeat:ANK 1                                     | <a href="#">RT</a>                                                                  |  | 33    | 1.1E-2  | 5.5E-1    |
| <input type="checkbox"/> | UP_SEQ_FEATURE | repeat:ANK 3                                     | <a href="#">RT</a>                                                                  |  | 29    | 1.1E-2  | 5.5E-1    |
| <input type="checkbox"/> | UP_SEQ_FEATURE | repeat:ANK 2                                     | <a href="#">RT</a>                                                                  |  | 33    | 1.2E-2  | 5.6E-1    |
| <input type="checkbox"/> | UP_SEQ_FEATURE | repeat:ANK 25                                    | <a href="#">RT</a>                                                                  |  | 4     | 1.7E-2  | 6.9E-1    |
| <input type="checkbox"/> | SMART          | <a href="#">ANK</a>                              | <a href="#">RT</a>                                                                  |  | 35    | 2.9E-2  | 4.1E-1    |
